# Supplementary material for: Environmentally Induced Epigenetic Transgenerational Inheritance of Ovarian Disease
Source: PubMed Central journal article supplement (PMC3343040; doi:10.1371/journal.pone.0036129), 2012-05-03
Supplement: pone.0036129.s001.pdf [file pone.0036129.s001.pdf]

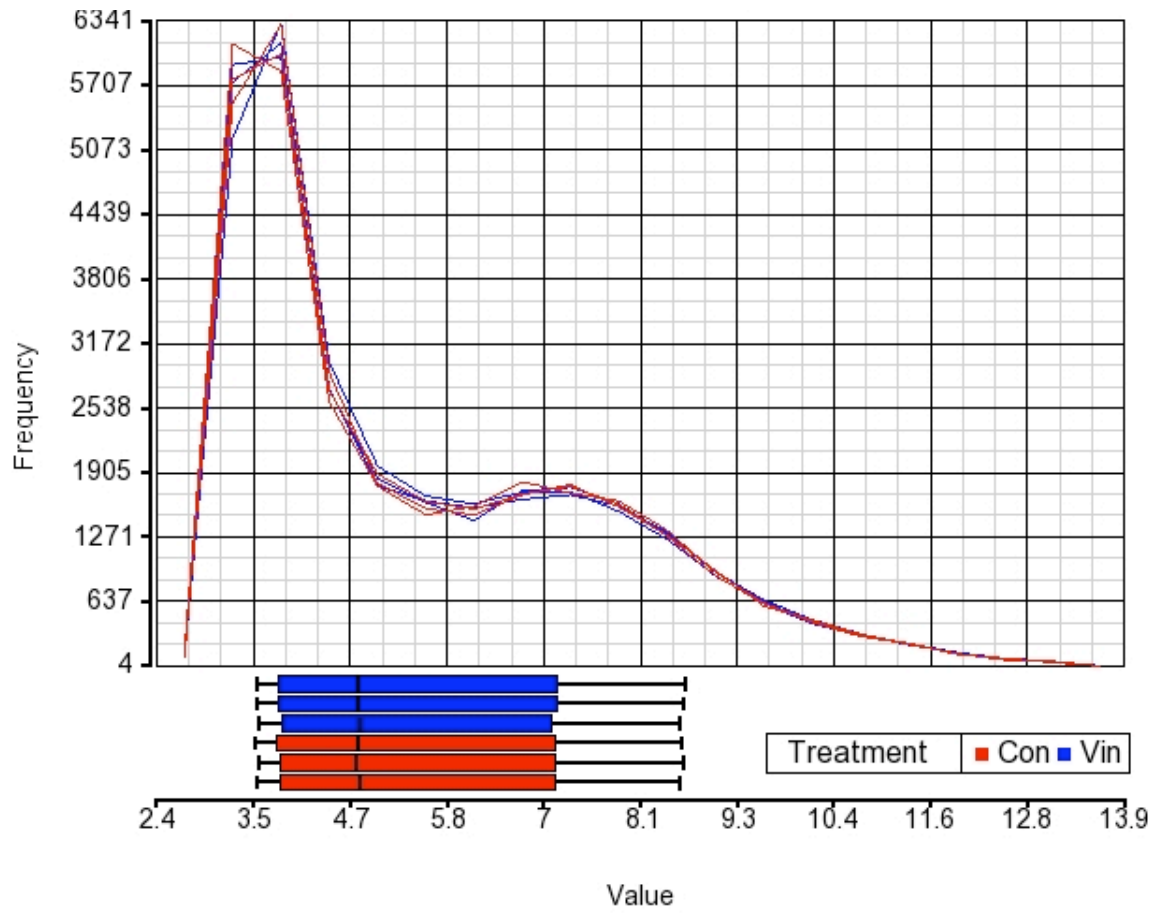

Supplemental Figure S1
