# Supplementary material for: Environmentally Induced Epigenetic Transgenerational Inheritance of Ovarian Disease
Source: PubMed Central journal article supplement (PMC3343040; doi:10.1371/journal.pone.0036129), 2012-05-03
Supplement: pone.0036129.s003.pdf [file pone.0036129.s003.pdf]

Supplemental Table S1

Rat Granulosa Cell Genes differentially expressed between F3 generation vinclozolin and control lineage animals (523 genes)

| Gene Symbol             | GenBank, RefSeq Number | Vin/C Ratio | Vin-Con, mean_dif | Affymetrix Probeset ID | Gene Title                                                                 |
|-------------------------|------------------------|-------------|-------------------|------------------------|----------------------------------------------------------------------------|
| <b>Apoptosis</b>        |                        |             |                   |                        |                                                                            |
| Apip                    | NM_001106492           | 1.22        | 13                | 10838145               | APAF1 interacting protein                                                  |
| Ciapin1                 | NM_001007689           | 1.30        | 87                | 10805986               | cytokine induced apoptosis inhibitor 1                                     |
| Fbf1                    | NM_001105854           | 0.77        | -16               | 10749142               | Fas (TNFRSF6) binding factor 1                                             |
| Nradd                   | NM_139259              | 1.35        | 64                | 10920461               | neurotrophin receptor associated death domain                              |
| Tnrc6b                  | NM_138845              | 0.82        | -46               | 10897821               | trinucleotide repeat containing 6B                                         |
| <b>Cell Cycle</b>       |                        |             |                   |                        |                                                                            |
| Bop1                    | NM_001024250           | 1.28        | 40                | 10904930               | block of proliferation 1                                                   |
| Cenpj                   | NM_001107265           | 0.73        | -20.3             | 10784074               | centromere protein J                                                       |
| Cep120                  | ENSRNOT0000002         | 0.76        | -32               | 10804486               | centrosomal protein 120kDa                                                 |
| Cspp1                   | XM_001060285           | 0.71        | -69               | 10875087               | centrosome and spindle pole associated protein 1                           |
| Fchsd2                  | NM_001107539           | 0.81        | -27               | 10709135               | FCH and double SH3 domains 2                                               |
| Nek2                    | NM_053691              | 0.72        | -38               | 10766765               | NIMA (never in mitosis gene a)-related expressed kinase 2                  |
| Nubp2                   | NM_001011891           | 1.21        | 74                | 10741248               | nucleotide binding protein 2                                               |
| Pot1b                   | XM_001073777           | 0.79        | -10               | 10931288               | protection of telomeres 1B                                                 |
| <b>Cytoskeleton-ECM</b> |                        |             |                   |                        |                                                                            |
| Actn4                   | NM_031675              | 1.30        | 231               | 10720274               | actinin alpha 4                                                            |
| Ankh                    | NM_053714              | 1.63        | 26                | 10813969               | ankylosis, progressive homolog (mouse)                                     |
| Arpc1b                  | NM_019289              | 1.44        | 104               | 10760196               | actin related protein 2/3 complex, subunit 1B                              |
| Arpc3                   | NM_001105933           | 1.24        | 46                | 10762021               | actin related protein 2/3 complex, subunit 3                               |
| Asam                    | NM_173154              | 1.73        | 36                | 10909338               | adipocyte-specific adhesion molecule                                       |
| Col4a3                  | NM_001135759           | 0.68        | -15               | 10924719               | collagen, type IV, alpha 3                                                 |
| Col6a1                  | ENSRNOT0000000         | 1.55        | 44                | 10829437               | collagen, type VI, alpha 1                                                 |
| Cot1l                   | NM_001108452           | 1.51        | 22                | 10811452               | coactosin-like 1 (Dictyostelium)                                           |
| Csrp1                   | NM_017148              | 1.77        | 179               | 10764221               | cysteine and glycine-rich protein 1                                        |
| Dmkn                    | NM_001173357           | 1.88        | 40                | 10706065               | dermokine                                                                  |
| Epdr1                   | NM_001007625           | 1.37        | 30                | 10795384               | ependymin related protein 1 (zebrafish)                                    |
| F11r                    | NM_053796              | 2.45        | 103               | 10765600               | F11 receptor                                                               |
| Kif1a                   | AM180765               | 1.84        | 39                | 10929937               | kinesin family member 1A                                                   |
| Krtap4-5                | ENSRNOT00000006        | 0.78        | -21               | 10747180               | keratin associated protein 4-5                                             |
| Lgals3bp                | NM_139096              | 1.71        | 149               | 10749495               | lectin, galactoside-binding, soluble, 3 binding protein                    |
| LOC360570               | NM_001172137           | 1.39        | 21                | 10736073               | similar to myosin XVIIIa                                                   |
| Marcks1l                | NM_030862              | 1.26        | 117               | 10872336               | MARCKS-like 1                                                              |
| Myl12b                  | NM_017343              | 1.25        | 87                | 10930416               | myosin, light chain 12B, regulatory                                        |
| Nid67                   | NM_173126              | 1.54        | 58                | 10804562               | putative small membrane protein NID67                                      |
| RGD1563615              | XM_001064593           | 0.61        | -14               | 10793429               | similar to Contactin associated protein-like 3 precursor (Cell recognition |
| Sdc1                    | NM_013026              | 1.64        | 66                | 10883530               | syndecan 1                                                                 |
| Tagln                   | NM_031549              | 2.02        | 134               | 10917034               | transgelin                                                                 |
| Tpm2                    | NM_001024345           | 1.86        | 31                | 10876324               | tropomyosin 2, beta                                                        |
| Tubb6                   | NM_001025675           | 1.86        | 43                | 10802422               | tubulin, beta 6                                                            |
| <b>Development</b>      |                        |             |                   |                        |                                                                            |
| Atxn7l1                 | ENSRNOT00000001        | 0.78        | -11               | 10884189               | ataxin 7-like 1                                                            |
| Bean                    | XM_341638              | 1.69        | 80                | 10809044               | brain expressed, associated with Nedd4                                     |
| Cln8                    | NM_001007686           | 1.22        | 21                | 10792676               | ceroid-lipofuscinosis, neuronal 8                                          |
| Fhl3                    | NM_001107979           | 1.48        | 12                | 10871806               | four and a half LIM domains 3                                              |
| Fln                     | NM_199390              | 1.23        | 23                | 10743171               | folliculin                                                                 |

|                           |                |      |       |          |                                                                   |
|---------------------------|----------------|------|-------|----------|-------------------------------------------------------------------|
| Jub                       | NM_053503      | 1.31 | 22    | 10783583 | jub, ajuba homolog (Xenopus laevis)                               |
| LOC501092                 | ENSRNOT0000004 | 0.77 | -12   | 10861620 | hypothetical LOC501092                                            |
| LOC680073                 | XR_086000      | 0.60 | -55   | 10767160 | similar to globin inducing factor, fetal                          |
| Npdc1                     | NM_001004231   | 1.37 | 35    | 10834225 | neural proliferation, differentiation and control, 1              |
| Rai2                      | NM_001109316   | 1.38 | 56    | 10937834 | retinoic acid induced 2                                           |
| Scrib                     | ENSRNOT0000004 | 0.81 | -30   | 10904714 | scribbled homolog (Drosophila)                                    |
| Sesn1                     | NM_001106396   | 1.21 | 22    | 10830561 | sestrin 1                                                         |
| Stim2                     | NM_001105750   | 0.80 | -43   | 10776992 | stromal interaction molecule 2                                    |
| Suhw3                     | ENSRNOT0000004 | 0.75 | -22   | 10939617 | suppressor of hairy wing homolog 3 (Drosophila)                   |
| Syng1                     | NM_019166      | 1.43 | 31    | 10897734 | synaptogyrin 1                                                    |
| Ttyh2                     | ENSRNOT0000000 | 1.33 | 133   | 10739399 | tweety homolog 2 (Drosophila)                                     |
| Unc13b                    | NM_001042579   | 0.70 | -19.9 | 10868437 | unc-13 homolog B (C. elegans)                                     |
| Vwa5a                     | NM_198755      | 1.65 | 124   | 10909210 | von Willebrand factor A domain containing 5A                      |
| Wfs1                      | NM_031823      | 1.27 | 22    | 10773290 | Wolfram syndrome 1 homolog (human)                                |
| Whsc1                     | XM_218310      | 0.75 | -54   | 10704372 | Wolf-Hirschhorn syndrome candidate 1 (human)                      |
| <b>DNA repair</b>         |                |      |       |          |                                                                   |
| RGD1561537                | XM_001058999   | 0.74 | -42   | 10796970 | similar to putative repair and recombination helicase RAD26L      |
| <b>Electron Transport</b> |                |      |       |          |                                                                   |
| Cox5a                     | NM_145783      | 1.27 | 187   | 10910338 | cytochrome c oxidase, subunit Va                                  |
| Cyb5b                     | NM_030586      | 1.30 | 92    | 10807632 | cytochrome b5 type B (outer mitochondrial membrane)               |
| Cyb5r3                    | NM_138877      | 1.30 | 62    | 10905804 | cytochrome b5 reductase 3                                         |
| Cyp1b1                    | NM_012940      | 2.28 | 145   | 10887947 | cytochrome P450, family 1, subfamily b, polypeptide 1             |
| Cyp27a1                   | NM_178847      | 1.45 | 67    | 10924411 | cytochrome P450, family 27, subfamily a, polypeptide 1            |
| Cyp2t1                    | NM_134369      | 1.32 | 15    | 10705313 | cytochrome P450, family 2, subfamily t, polypeptide 1             |
| Cyp51                     | NM_012941      | 1.69 | 550   | 10853471 | cytochrome P450, family 51                                        |
| Fdxr                      | NM_024153      | 1.34 | 289   | 10748909 | ferredoxin reductase                                              |
| Prdx3                     | NM_022540      | 1.44 | 811   | 10731210 | peroxiredoxin 3                                                   |
| Prdx5                     | NM_053610      | 1.23 | 77    | 10728240 | peroxiredoxin 5                                                   |
| Prdx6                     | NM_053576      | 1.28 | 161   | 10769218 | peroxiredoxin 6                                                   |
| <b>Epigenetics</b>        |                |      |       |          |                                                                   |
| Bhmt                      | NM_030850      | 2.14 | 66    | 10820494 | betaine-homocysteine methyltransferase                            |
| Comtd1                    | NM_001107249   | 1.38 | 16    | 10778997 | catechol-O-methyltransferase domain containing 1                  |
| H2afy2                    | NM_001135807   | 0.72 | -34   | 10833093 | H2A histone family, member Y2                                     |
| Hmg1l1                    | NM_001109373   | 0.82 | -413  | 10709775 | high-mobility group (nonhistone chromosomal) protein 1-like 1     |
| Hmgb1                     | NM_012963      | 0.77 | -550  | 10902247 | high mobility group box 1                                         |
| Htatip2                   | NM_001106263   | 1.80 | 76    | 10707230 | HIV-1 tat interactive protein 2, homolog (human)                  |
| Mettl7a                   | NM_001037355   | 1.34 | 23    | 10899263 | methyltransferase like 7A                                         |
| Smyd2                     | NM_206851      | 1.33 | 56    | 10770666 | SET and MYND domain containing 2                                  |
| Suv420h2                  | NM_001107475   | 0.82 | -24   | 10718873 | suppressor of variegation 4-20 homolog 2 (Drosophila)             |
| Wdr77                     | NM_001008771   | 1.24 | 67    | 10818173 | WD repeat domain 77                                               |
| <b>Golgi Apparatus</b>    |                |      |       |          |                                                                   |
| Golga1                    | NM_001107842   | 0.83 | -18   | 10844889 | golgi autoantigen, golgin subfamily a, 1                          |
| Mpdu1                     | NM_001107011   | 1.22 | 77    | 10744119 | mannose-P-dolichol utilization defect 1                           |
| Pigs                      | NM_001006602   | 1.20 | 51    | 10745081 | phosphatidylinositol glycan anchor biosynthesis, class S          |
| Pde6d                     | NM_001108806   | 1.22 | 66    | 10929600 | phosphodiesterase 6D, cGMP-specific, rod, delta                   |
| <b>Growth Factors</b>     |                |      |       |          |                                                                   |
| Angptl2                   | NM_133569      | 1.33 | 23    | 10835654 | angiopoietin-like 2                                               |
| Creg1                     | NM_001105966   | 2.04 | 667   | 10765335 | cellular repressor of E1A-stimulated genes 1                      |
| Cxcl12                    | NM_001033883   | 1.69 | 40    | 10858165 | chemokine (C-X-C motif) ligand 12 (stromal cell-derived factor 1) |
| Ghr                       | NM_017094      | 1.28 | 15    | 10821632 | growth hormone receptor                                           |
| Pdgfrb                    | NM_031525      | 1.88 | 36    | 10802040 | platelet derived growth factor receptor, beta polypeptide         |
| <b>Immune Response</b>    |                |      |       |          |                                                                   |

|                                   |                |      |      |          |                                                                            |
|-----------------------------------|----------------|------|------|----------|----------------------------------------------------------------------------|
| A2m                               | NM_012488      | 2.50 | 332  | 10858408 | alpha-2-macroglobulin                                                      |
| C1qa                              | NM_001008515   | 1.63 | 14   | 10880734 | complement component 1, q subcomponent, A chain                            |
| C7                                | AF309948       | 1.58 | 16   | 10821666 | complement component 7                                                     |
| Cd97                              | NM_001012164   | 1.46 | 28   | 10806806 | CD97 molecule                                                              |
| Ctage5                            | NM_001106734   | 1.21 | 69   | 10884772 | CTAGE <Cutaneous T-cell lymphoma-associated antigen 5> family, membe       |
| Fcgr2a                            | NM_053843      | 1.44 | 11   | 10769797 | Fc fragment of IgG, low affinity IIa, receptor (CD32)                      |
| Fcgrt                             | NM_033351      | 1.60 | 84   | 10721667 | Fc fragment of IgG, receptor, transporter, alpha                           |
| Ifi47                             | NM_172019      | 2.41 | 83   | 10733056 | interferon gamma inducible protein 47                                      |
| Irgm                              | NM_001012007   | 1.75 | 17   | 10742348 | immunity-related GTPase family, M                                          |
| RT1-A1                            | NM_001008827   | 1.27 | 21   | 10828417 | RT1 class Ia, locus A1                                                     |
| RT1-CE15                          | NM_001008838   | 1.32 | 23   | 10833979 | RT1 class I, locus CE15                                                    |
| RT1-DMa                           | NM_198741      | 1.26 | 21   | 10831628 | RT1 class II, locus DMa                                                    |
| RT1-DMb                           | NM_198740      | 2.55 | 24   | 10831620 | RT1 class II, locus DMb                                                    |
| Spa17                             | NM_053482      | 0.79 | -35  | 10916232 | sperm autoantigenic protein 17                                             |
| Xkr8                              | NM_001012099   | 1.34 | 11   | 10872681 | XK, Kell blood group complex subunit-related family, member 8              |
| <b>Metabolism &amp; Transport</b> |                |      |      |          |                                                                            |
| Aadat                             | NM_017193      | 2.69 | 103  | 10791478 | aminoadipate aminotransferase                                              |
| Abhd14b                           | NM_001007664   | 1.26 | 108  | 10912845 | abhydrolase domain containing 14b                                          |
| Abhd4                             | NM_001108866   | 1.57 | 505  | 10780179 | abhydrolase domain containing 4                                            |
| Abhd6                             | NM_001007680   | 1.26 | 53   | 10782695 | abhydrolase domain containing 6                                            |
| Acox1                             | NM_017340      | 1.30 | 62   | 10749172 | acyl-Coenzyme A oxidase 1, palmitoyl                                       |
| Acs1                              | NM_012820      | 1.52 | 28   | 10791677 | acyl-CoA synthetase long-chain family member 1                             |
| Acs15                             | NM_053607      | 1.21 | 33   | 10716168 | acyl-CoA synthetase long-chain family member 5                             |
| Agpat2                            | NM_001107821   | 1.51 | 238  | 10843838 | 1-acylglycerol-3-phosphate O-acyltransferase 2 (lysophosphatidic acid acyl |
| Akr7a2                            | NM_134407      | 1.23 | 40   | 10873378 | aldo-keto reductase family 7, member A2 (aflatoxin aldehyde reductase)     |
| Aldh1a1                           | NM_022407      | 1.56 | 710  | 10714323 | aldehyde dehydrogenase 1 family, member A1                                 |
| Aldh3b1                           | NM_001006998   | 1.66 | 48   | 10727405 | aldehyde dehydrogenase 3 family, member B1                                 |
| Apobec3f                          | NM_001033703   | 1.24 | 13   | 10897723 | apolipoprotein B mRNA editing enzyme, catalytic polypeptide-like 3F        |
| Aprt                              | NM_001013061   | 1.27 | 27   | 10811651 | adenine phosphoribosyl transferase                                         |
| Bcat2                             | NM_022400      | 1.33 | 50   | 10706884 | branched chain aminotransferase 2, mitochondrial                           |
| Bckdha                            | NM_012782      | 1.30 | 89   | 10719863 | branched chain ketoacid dehydrogenase E1, alpha polypeptide                |
| Bco2                              | NM_001127712   | 1.35 | 38   | 10917215 | beta-carotene oxygenase 2                                                  |
| Clic2                             | NM_001009651   | 2.32 | 31   | 10827592 | chloride intracellular channel 2                                           |
| Cpt1a                             | NM_031559      | 1.45 | 158  | 10712657 | carnitine palmitoyltransferase 1a, liver                                   |
| Ddt                               | NM_024131      | 1.22 | 223  | 10832551 | D-dopachrome tautomerase                                                   |
| Dhcr24                            | NM_001080148   | 1.51 | 146  | 10870567 | 24-dehydrocholesterol reductase                                            |
| Dhcr7                             | NM_022389      | 1.33 | 362  | 10712560 | 7-dehydrocholesterol reductase                                             |
| Echs1                             | NM_078623      | 1.24 | 149  | 10726611 | enoyl Coenzyme A hydratase, short chain, 1, mitochondrial                  |
| Exosc5                            | NM_001107493   | 1.30 | 57   | 10705202 | exosome component 5                                                        |
| Exosc6                            | ENSRNOT0000002 | 1.32 | 17   | 10808063 | exosome component 6                                                        |
| Fads1                             | NM_053445      | 1.57 | 352  | 10713857 | fatty acid desaturase 1                                                    |
| Fads2                             | NM_031344      | 1.36 | 316  | 10728631 | fatty acid desaturase 2                                                    |
| Fads3                             | NM_173137      | 1.34 | 18   | 10713844 | fatty acid desaturase 3                                                    |
| Fads6                             | NM_001107064   | 1.51 | 88   | 10748922 | fatty acid desaturase domain family, member 6                              |
| Fmo1                              | NM_012792      | 2.26 | 42   | 10769361 | flavin containing monooxygenase 1                                          |
| Fuca2                             | NM_001004218   | 1.44 | 74   | 10701817 | fucosidase, alpha-L- 2, plasma                                             |
| Gcat                              | NM_001024277   | 1.59 | 16   | 10897574 | glycine C-acetyltransferase (2-amino-3-ketobutyrate-coenzyme A ligase)     |
| Gltpd1                            | NM_001007703   | 1.28 | 15   | 10882234 | glycolipid transfer protein domain containing 1                            |
| Got1                              | NM_012571      | 1.60 | 365  | 10715364 | glutamic-oxaloacetic transaminase 1, soluble (aspartate aminotransferase   |
| Got2                              | NM_013177      | 1.26 | 87   | 10805794 | glutamic-oxaloacetic transaminase 2, mitochondrial (aspartate aminotran    |
| Gsta3                             | NM_031509      | 1.95 | 1197 | 10926958 | glutathione S-transferase A3                                               |
| Gstt1                             | NM_053293      | 1.71 | 127  | 10832555 | glutathione S-transferase theta 1                                          |

|            |                |      |       |          |                                                                             |
|------------|----------------|------|-------|----------|-----------------------------------------------------------------------------|
| Gstt2      | NM_012796      | 1.21 | 64    | 10829653 | glutathione S-transferase, theta 2                                          |
| Gstt3      | NM_001137643   | 1.72 | 151   | 10832563 | glutathione S-transferase, theta 3                                          |
| Hbb        | NM_033234      | 0.46 | -1078 | 10724315 | hemoglobin, beta                                                            |
| Hibadh     | NM_022243      | 1.37 | 241   | 10862586 | 3-hydroxyisobutyrate dehydrogenase                                          |
| Hmgcr      | NM_013134      | 1.43 | 335   | 10820666 | 3-hydroxy-3-methylglutaryl-Coenzyme A reductase                             |
| Hpx        | NM_053318      | 2.28 | 72    | 10724483 | hemopexin                                                                   |
| Idh1       | NM_031510      | 1.35 | 780   | 10928563 | isocitrate dehydrogenase 1 (NADP+), soluble                                 |
| Isoc1      | NM_001014242   | 1.21 | 110   | 10801929 | isochorismatase domain containing 1                                         |
| Ivd        | NM_012592      | 1.21 | 67    | 10838704 | isovaleryl coenzyme A dehydrogenase                                         |
| Lactb      | NM_001106833   | 1.32 | 23    | 10918385 | lactamase, beta                                                             |
| Lcat       | NM_017024      | 0.78 | -14   | 10810736 | lecithin cholesterol acyltransferase                                        |
| Lipe       | NM_012859      | 1.44 | 26    | 10719829 | lipase, hormone sensitive                                                   |
| LOC308670  | ENSRNOT0000001 | 0.70 | -16   | 10707572 | pink-eyed dilution                                                          |
| Lpl        | NM_012598      | 1.37 | 10    | 10791250 | lipoprotein lipase                                                          |
| Me1        | NM_012600      | 1.35 | 871   | 10919103 | malic enzyme 1, NADP(+)-dependent, cytosolic                                |
| Mfsd1      | XM_342258      | 1.31 | 50    | 10815850 | major facilitator superfamily domain containing 1                           |
| Mgst1      | NM_134349      | 1.44 | 329   | 10859392 | microsomal glutathione S-transferase 1                                      |
| Mvd        | NM_031062      | 1.83 | 104   | 10811560 | mevalonate (diphospho) decarboxylase                                        |
| Nadk       | NM_001109678   | 1.24 | 89    | 10874655 | NAD kinase                                                                  |
| Nampt      | NM_177928      | 1.24 | 35    | 10884162 | nicotinamide phosphoribosyltransferase                                      |
| Nit1       | NM_182668      | 1.37 | 121   | 10769870 | nitrilase 1                                                                 |
| Nsdhl      | NM_001009399   | 1.43 | 99    | 10935845 | NAD(P) dependent steroid dehydrogenase-like                                 |
| Pafah2     | NM_177932      | 1.29 | 23    | 10872790 | platelet-activating factor acetylhydrolase 2                                |
| Pctk3      | NM_001100506   | 1.21 | 11    | 10767577 | PCTAIRE protein kinase 3                                                    |
| Pcyox1l    | NM_001134542   | 1.30 | 46    | 10804714 | prenylcysteine oxidase 1 like                                               |
| Piga       | NM_001108816   | 0.81 | -22   | 10937719 | phosphatidylinositol glycan anchor biosynthesis, class A                    |
| Plb1       | NM_138898      | 1.93 | 31    | 10888701 | phospholipase B1                                                            |
| Pnpla2     | NM_001108509   | 1.38 | 80    | 10712317 | patatin-like phospholipase domain containing 2                              |
| Pold4      | NM_001013195   | 1.37 | 16    | 10712858 | polymerase (DNA-directed), delta 4                                          |
| Ppa2       | NM_001135871   | 1.21 | 27    | 10819116 | pyrophosphatase (inorganic) 2                                               |
| Ppap2a     | NM_022538      | 1.65 | 79    | 10813048 | phosphatidic acid phosphatase type 2A                                       |
| Prr13      | NM_001008379   | 1.23 | 133   | 10899566 | proline rich 13                                                             |
| Psap       | NM_013013      | 1.35 | 858   | 10829976 | prosaposin                                                                  |
| Pyroxd2    | NM_001004261   | 1.27 | 40    | 10715400 | pyridine nucleotide-disulphide oxidoreductase domain 2                      |
| Qsox2      | NM_001109434   | 1.28 | 159   | 10843664 | quiescin Q6 sulfhydryl oxidase 2                                            |
| RGD1303003 | NM_001004225   | 1.29 | 49    | 10829265 | homolog of zebrafish ES1                                                    |
| RGD1562373 | NM_001040019   | 1.26 | 20.39 | 10920820 | similar to 3-ketoacyl-CoA thiolase B, peroxisomal precursor (Beta-ketothio  |
| Rhbdf1     | NM_001030034   | 1.20 | 11    | 10732607 | rhomoid 5 homolog 1 (Drosophila)                                            |
| Sc4mol     | NM_080886      | 1.83 | 1163  | 10787841 | sterol-C4-methyl oxidase-like                                               |
| Sc5dl      | NM_053642      | 1.59 | 155   | 10916534 | sterol-C5-desaturase (ERG3 delta-5-desaturase homolog, S. cerevisiae)-lik   |
| Scd        | NM_031841      | 1.24 | 848   | 10715546 | stearoyl-CoA desaturase (delta-9-desaturase)                                |
| Sclt1      | NM_153740      | 0.77 | -15   | 10822989 | sodium channel and clathrin linker 1                                        |
| Scrn3      | NM_001013162   | 0.82 | -28   | 10836973 | secernin 3                                                                  |
| Selenbp1   | NM_080892      | 1.58 | 72    | 10824892 | selenium binding protein 1                                                  |
| Sfxn1      | NM_001012213   | 1.70 | 70    | 10797475 | sideroflexin 1                                                              |
| Sh3bgrl3   | NM_001106688   | 1.46 | 76    | 10880436 | SH3 domain binding glutamic acid-rich protein-like 3                        |
| Slc1a3     | NM_019225      | 1.54 | 11    | 10821824 | solute carrier family 1 (glial high affinity glutamate transporter), member |
| Slc25a1    | NM_017307      | 1.30 | 125   | 10752367 | solute carrier family 25 (mitochondrial carrier, citrate transporter), memb |
| Slc25a40   | NM_001037186   | 0.80 | -18   | 10853292 | solute carrier family 25, member 40                                         |
| Slc27a1    | NM_053580      | 1.21 | 134   | 10787313 | solute carrier family 27 (fatty acid transporter), member 1                 |
| Slc27a3    | NM_001106439   | 1.38 | 40    | 10824611 | solute carrier family 27 (fatty acid transporter), member 3                 |
| Slc36a1    | NM_130415      | 1.25 | 47    | 10733697 | solute carrier family 36 (proton/amino acid symporter), member 1            |

|                                         |                |      |      |          |                                                                            |
|-----------------------------------------|----------------|------|------|----------|----------------------------------------------------------------------------|
| Slc39a6                                 | NM_001024745   | 1.21 | 73   | 10803520 | solute carrier family 39 (zinc transporter), member 6                      |
| Slc7a4                                  | NM_001107078   | 1.38 | 35   | 10752433 | solute carrier family 7 (cationic amino acid transporter, y+ system), memb |
| Slc9a3r1                                | NM_021594      | 1.52 | 54   | 10739490 | solute carrier family 9 (sodium/hydrogen exchanger), member 3 regulator    |
| Smpd1                                   | NM_001006997   | 1.25 | 188  | 10709575 | sphingomyelin phosphodiesterase 1, acid lysosomal                          |
| Sod2                                    | NM_017051      | 1.35 | 446  | 10717935 | superoxide dismutase 2, mitochondrial                                      |
| Sord                                    | NM_017052      | 1.33 | 195  | 10839254 | sorbitol dehydrogenase                                                     |
| Sphk1                                   | NM_133386      | 1.30 | 10   | 10739796 | sphingosine kinase 1                                                       |
| Sptlc1                                  | NM_001108406   | 1.33 | 90   | 10794206 | serine palmitoyltransferase, long chain base subunit 1                     |
| Sqle                                    | NM_017136      | 1.58 | 194  | 10896772 | squalene epoxidase                                                         |
| Star                                    | NM_031558      | 1.64 | 1240 | 10792251 | steroidogenic acute regulatory protein                                     |
| Stard4                                  | NM_001106159   | 1.31 | 21   | 10803681 | StAR-related lipid transfer (START) domain containing 4                    |
| Sumf1                                   | NM_001108639   | 1.28 | 31   | 10864540 | sulfatase modifying factor 1                                               |
| Tap1                                    | NM_032055      | 1.44 | 28   | 10831606 | transporter 1, ATP-binding cassette, sub-family B (MDR/TAP)                |
| Trappc6a                                | NM_001109410   | 1.39 | 33   | 10704849 | trafficking protein particle complex 6A                                    |
| Tst                                     | NM_012808      | 1.82 | 242  | 10905284 | thiosulfate sulfurtransferase                                              |
| Unc93b1                                 | NM_001108513   | 1.58 | 83   | 10712720 | unc-93 homolog B1 (C. elegans)                                             |
| Vat1                                    | NM_001033683   | 1.35 | 64   | 10747633 | vesicle amine transport protein 1 homolog (T californica)                  |
| Pgd                                     | ENSRNOT0000001 | 1.23 | 182  | 10881671 | phosphogluconate dehydrogenase                                             |
| <b>Proteolysis</b>                      |                |      |      |          |                                                                            |
| Ctsd                                    | NM_134334      | 1.48 | 564  | 10726979 | cathepsin D                                                                |
| Ctsf                                    | NM_001034110   | 1.36 | 40   | 10712935 | cathepsin F                                                                |
| Hecw1                                   | NM_001106117   | 0.69 | -37  | 10795482 | HECT, C2 and WW domain containing E3 ubiquitin protein ligase 1            |
| Mmp2                                    | NM_031054      | 1.58 | 52   | 10809540 | matrix metalloproteinase 2                                                 |
| Mon1b                                   | NM_001107433   | 1.49 | 51   | 10808138 | MON1 homolog b (yeast)                                                     |
| Pcolce                                  | NM_019237      | 1.51 | 405  | 10760971 | procollagen C-endopeptidase enhancer                                       |
| Pkia                                    | NM_053772      | 1.26 | 35   | 10822386 | protein kinase (cAMP-dependent, catalytic) inhibitor alpha                 |
| Psbm10                                  | NM_001025637   | 1.24 | 14   | 10810727 | proteasome (prosome, macropain) subunit, beta type 10                      |
| Psbm8                                   | NM_080767      | 1.72 | 41   | 10831595 | proteasome (prosome, macropain) subunit, beta type 8 (large multifunct     |
| Spinlw1                                 | NM_001109457   | 0.74 | -139 | 10851628 | serine peptidase inhibitor-like, with Kunitz and WAP domains 1 (eppin)     |
| Timp1                                   | NM_053819      | 1.51 | 474  | 10936482 | TIMP metalloproteinase inhibitor 1                                         |
| Ube2n                                   | BC090072       | 0.73 | -12  | 10759435 | ubiquitin-conjugating enzyme E2N                                           |
| Vps28                                   | NM_001130492   | 1.27 | 144  | 10905040 | vacuolar protein sorting 28 homolog (S. cerevisiae)                        |
| Wfdc10                                  | NM_001109461   | 0.69 | -121 | 10842156 | WAP four-disulfide core domain 10                                          |
| Xpnpep2                                 | NM_057155      | 2.10 | 84   | 10935289 | X-prolyl aminopeptidase (aminopeptidase P) 2, membrane-bound               |
| <b>Receptors &amp; Binding Proteins</b> |                |      |      |          |                                                                            |
| Abcc4                                   | NM_133411      | 1.40 | 79   | 10785846 | ATP-binding cassette, sub-family C (CFTR/MRP), member 4                    |
| Chp                                     | NM_024139      | 1.37 | 157  | 10876827 | calcium binding protein p22                                                |
| Chrn4                                   | NM_052806      | 1.40 | 22   | 10917607 | cholinergic receptor, nicotinic, beta 4                                    |
| Dbp                                     | NM_012543      | 1.46 | 49   | 10706953 | D site of albumin promoter (albumin D-box) binding protein                 |
| Ebp                                     | NM_057137      | 1.62 | 81   | 10932410 | emopamil binding protein (sterol isomerase)                                |
| Ebpl                                    | NM_001108381   | 1.36 | 13   | 10784355 | emopamil binding protein-like                                              |
| F2r                                     | NM_012950      | 1.57 | 73   | 10820586 | coagulation factor II (thrombin) receptor                                  |
| Leng4                                   | NM_001134978   | 1.31 | 60   | 10703715 | leukocyte receptor cluster (LRC) member 4                                  |
| LOC683722                               | NM_001101008   | 0.62 | -27  | 10718111 | similar to Fgfr1 oncogene partner                                          |
| Lrp10                                   | NM_001037777   | 1.33 | 137  | 10780218 | low-density lipoprotein receptor-related protein 10                        |
| Lrp11                                   | NM_001106217   | 1.23 | 15   | 10701699 | low density lipoprotein receptor-related protein 11                        |
| Mrap                                    | NM_001135834   | 1.52 | 193  | 10750173 | melanocortin 2 receptor accessory protein                                  |
| Npffr1                                  | NM_022291      | 0.55 | -52  | 10830034 | neuropeptide FF receptor 1                                                 |
| Peptd                                   | NM_001009641   | 1.26 | 151  | 10706117 | peptidase D                                                                |
| Pvr12                                   | NM_001012064   | 1.39 | 33   | 10719549 | poliovirus receptor-related 2                                              |
| Renbp                                   | NM_031095      | 1.23 | 14   | 10940260 | renin binding protein                                                      |
| Sigmar1                                 | NM_030996      | 1.22 | 60   | 10876185 | sigma non-opioid intracellular receptor 1                                  |

|                  |                |      |       |          |                                                                             |
|------------------|----------------|------|-------|----------|-----------------------------------------------------------------------------|
| Tax1bp3          | NM_001025419   | 1.36 | 118   | 10735662 | Tax1 (human T-cell leukemia virus type I) binding protein 3                 |
| Tm7sf2           | NM_001013071   | 2.26 | 195   | 10728123 | transmembrane 7 superfamily member 2                                        |
| Tmem110          | NM_198774      | 1.22 | 24    | 10786522 | transmembrane protein 110                                                   |
| Tmem126b         | NM_001106280   | 1.26 | 34    | 10723644 | transmembrane protein 126B                                                  |
| Tmem147          | NM_001038494   | 1.31 | 93    | 10720767 | transmembrane protein 147                                                   |
| Tmem150c         | NM_001108354   | 1.80 | 53    | 10771456 | transmembrane protein 150C                                                  |
| Tmem19           | NM_199098      | 1.21 | 30    | 10902401 | transmembrane protein 19                                                    |
| Tmem20           | XM_220029      | 1.66 | 158   | 10715149 | transmembrane protein 20                                                    |
| Tmem205          | NM_001106804   | 1.53 | 81    | 10915657 | transmembrane protein 205                                                   |
| Tmem62           | ENSRNOT0000003 | 1.23 | 19    | 10839075 | transmembrane protein 62                                                    |
| Tmem8            | NM_001106991   | 1.27 | 20,23 | 10732534 | transmembrane protein 8 (five membrane-spanning domains)                    |
| Tmem86a          | NM_001135016   | 1.23 | 687   | 10707151 | transmembrane protein 86A                                                   |
| <b>Signaling</b> |                |      |       |          |                                                                             |
| Acvr1l1          | NM_022441      | 1.41 | 11    | 10899354 | activin A receptor type II-like 1                                           |
| Agfg2            | NM_001107131   | 1.25 | 15    | 10760994 | ArfGAP with FG repeats 2                                                    |
| Ak3              | NM_013218      | 1.21 | 103   | 10729590 | adenylate kinase 3                                                          |
| Anxa11           | NM_001011918   | 1.28 | 67    | 10786174 | annexin A11                                                                 |
| Anxa6            | NM_024156      | 1.31 | 232   | 10742712 | annexin A6                                                                  |
| Apln             | NM_031612      | 1.77 | 27    | 10939564 | apelin                                                                      |
| Arhgap12         | NM_001107357   | 0.70 | -177  | 10795574 | Rho GTPase activating protein 12                                            |
| Aurkaip1         | NM_001004237   | 1.23 | 100   | 10874723 | aurora kinase A interacting protein 1                                       |
| Avpi1            | NM_134373      | 2.11 | 195   | 10715452 | arginine vasopressin-induced 1                                              |
| Bambi            | NM_139082      | 0.75 | -117  | 10798850 | BMP and activin membrane-bound inhibitor, homolog ( <i>Xenopus laevis</i> ) |
| Btbd12           | ENSRNOT0000003 | 0.81 | -22   | 10731872 | BTB (POZ) domain containing 12                                              |
| Cib1             | NM_031145      | 1.41 | 83    | 10723032 | calcium and integrin binding 1 (calmyrin)                                   |
| Crkrs            | NM_001033867   | 0.80 | -42   | 10737927 | Cdc2-related kinase, arginine/serine-rich                                   |
| Dclk2            | NM_001009691   | 1.44 | 23    | 10824091 | doublecortin-like kinase 2                                                  |
| Dlc1             | NM_001127446   | 1.35 | 22    | 10788462 | deleted in liver cancer 1                                                   |
| Dtx3l            | NM_001109053   | 1.44 | 48    | 10751459 | deltex 3-like ( <i>Drosophila</i> )                                         |
| Dusp16           | NM_001106624   | 1.39 | 51    | 10866401 | dual specificity phosphatase 16                                             |
| Eepd1            | NM_001014088   | 1.44 | 35    | 10908682 | endonuclease/exonuclease/phosphatase family domain containing 1             |
| Egfl7            | NM_139104      | 1.39 | 11    | 10834447 | EGF-like-domain, multiple 7                                                 |
| Ehd2             | NM_001024897   | 1.58 | 32    | 10719204 | EH-domain containing 2                                                      |
| Farp2            | NM_001108233   | 1.30 | 17    | 10925609 | FERM, RhoGEF and pleckstrin domain protein 2                                |
| Fastkd5          | XR_086207      | 1.28 | 27    | 10849925 | FAST kinase domains 5                                                       |
| Fert2            | NM_001106928   | 0.78 | -30   | 10925761 | fer (fms/fps related) protein kinase, testis specific 2                     |
| Fkbp1a           | NM_013102      | 1.28 | 62    | 10840741 | FK506 binding protein 1a                                                    |
| Frmf8            | NM_001008348   | 1.32 | 32    | 10728030 | FERM domain containing 8                                                    |
| Fxyd5            | NM_021909      | 2.23 | 48    | 10720859 | FXDY domain-containing ion transport regulator 5                            |
| Gm2a             | NM_172335      | 1.47 | 441   | 10733690 | GM2 ganglioside activator                                                   |
| Gpr176           | ENSRNOT0000000 | 1.82 | 26    | 10848429 | G protein-coupled receptor 176                                              |
| Gpr177           | NM_001085353   | 1.23 | 234   | 10819975 | G protein-coupled receptor 177                                              |
| Impa2            | NM_172224      | 0.71 | -10   | 10802407 | inositol (myo)-1(or 4)-monophosphatase 2                                    |
| Insig1           | NM_022392      | 1.47 | 480   | 10861986 | insulin induced gene 1                                                      |
| Khdrbs3          | NM_022249      | 1.22 | 16    | 10896948 | KH domain containing, RNA binding, signal transduction associated 3         |
| Magmas           | NM_001100136   | 1.59 | 24    | 10731783 | mitochondria-associated protein involved in granulocyte-macrophage          |
| Mapk13           | NM_019231      | 1.43 | 11    | 10828778 | mitogen activated protein kinase 13                                         |
| Mobk12a          | NM_001108734   | 1.34 | 31    | 10893739 | MOB1, Mps One Binder kinase activator-like 2A (yeast)                       |
| Nxn              | NM_001108285   | 1.53 | 78    | 10736545 | nucleoredoxin                                                               |
| P2ry14           | NM_133577      | 1.46 | 14    | 10823353 | purinergic receptor P2Y, G-protein coupled, 14                              |
| Pex6             | NM_057125      | 1.27 | 34    | 10921677 | peroxisomal biogenesis factor 6                                             |
| Phlda3           | NM_001012206   | 1.54 | 13    | 10764228 | pleckstrin homology-like domain, family A, member 3                         |

|                      |                |      |       |          |                                                                     |
|----------------------|----------------|------|-------|----------|---------------------------------------------------------------------|
| Plekhb2              | NM_001106899   | 1.30 | 93    | 10922476 | pleckstrin homology domain containing, family B (evectins) member 2 |
| Plekhm1              | NM_001009677   | 1.24 | 24    | 10748061 | pleckstrin homology domain containing, family M (with RUN domain)   |
| Prkcdbp              | NM_134449      | 1.59 | 57    | 10724464 | protein kinase C, delta binding protein                             |
| Rab30                | NM_001015012   | 0.78 | -15   | 10708665 | RAB30, member RAS oncogene family                                   |
| Rab31                | NM_145094      | 1.72 | 58    | 10930259 | RAB31, member RAS oncogene family                                   |
| Rab33a               | NM_001108257   | 2.12 | 64    | 10935353 | RAB33A, member of RAS oncogene family                               |
| Rab5c                | NM_001105840   | 1.22 | 111   | 10747459 | RAB5C, member RAS oncogene family                                   |
| Rap1a                | NM_001005765   | 0.75 | -84   | 10825727 | RAP1A, member of RAS oncogene family                                |
| RGD1562220           | ENSRNOT0000000 | 0.61 | -322  | 10771492 | similar to GPI-gamma 4; GPIgamma4                                   |
| RGD1562230           | BC166848       | 0.72 | -25   | 10829933 | similar to catenin alpha 3                                          |
| RGD1563970           | ENSRNOT0000005 | 1.76 | 22    | 10724391 | similar to Tripartite motif protein 30-like                         |
| RGD1564174           | AB510354       | 1.72 | 137   | 10778404 | similar to novel protein similar to Tensin Tns                      |
| Rhoj                 | NM_001008320   | 1.81 | 41    | 10885299 | ras homolog gene family, member J                                   |
| Ssu72                | NM_001025657   | 1.29 | 181   | 10874693 | SSU72 RNA polymerase II CTD phosphatase homolog (S. cerevisiae)     |
| Stk19                | NM_001013197   | 1.20 | 13    | 10828221 | serine/threonine kinase 19                                          |
| Tbc1d25              | NM_001106955   | 1.32 | 21    | 10932416 | TBC1 domain family, member 25                                       |
| Tns4                 | NM_001024881   | 1.38 | 21    | 10747011 | tensin 4                                                            |
| Vrk2                 | NM_001108366   | 0.75 | -16   | 10778806 | vaccinia related kinase 2                                           |
| Ywhab                | NM_019377      | 1.21 | 236   | 10842052 | tyrosine 3-monooxygenase/tryptophan 5-monooxygenase activation      |
| <b>Transcription</b> |                |      |       |          |                                                                     |
| Ankrd26              | ENSRNOT0000005 | 0.76 | -13   | 10864979 | ankyrin repeat domain 26                                            |
| Asb3                 | NM_001108864   | 0.78 | -38   | 10774880 | ankyrin repeat and SOCS box-containing 3                            |
| Atf5                 | NM_172336      | 1.43 | 20.01 | 10721480 | activating transcription factor 5                                   |
| Casc5                | ENSRNOT0000006 | 0.47 | -94   | 10838741 | cancer susceptibility candidate 5                                   |
| Ccdc112              | NM_001109124   | 0.75 | -26   | 10804371 | coiled-coil domain containing 112                                   |
| Ccdc163              | NM_001025656   | 0.63 | -14   | 10871293 | coiled-coil domain containing 163                                   |
| Ccdc34               | NM_001108587   | 0.75 | -25   | 10838373 | coiled-coil domain containing 34                                    |
| Ccdc46               | NM_001105849   | 0.60 | -24   | 10739282 | coiled-coil domain containing 46                                    |
| Ccdc55               | NM_001037189   | 0.72 | -37   | 10736476 | coiled-coil domain containing 55                                    |
| Ccdc62               | NM_001134766   | 0.75 | -13   | 10761792 | coiled-coil domain containing 62                                    |
| Dnajc15              | NM_001106050   | 1.48 | 153   | 10785372 | DnaJ (Hsp40) homolog, subfamily C, member 15                        |
| Dnajc21              | NM_138856      | 0.81 | -19   | 10821900 | DnaJ (Hsp40) homolog, subfamily C, member 21                        |
| Dnlz                 | NR_024073      | 1.28 | 79    | 10843693 | DNL-type zinc finger                                                |
| Eny2                 | NM_001130580   | 0.77 | -132  | 10896400 | enhancer of yellow 2 homolog (Drosophila)                           |
| Esr1                 | NM_012689      | 1.38 | 15    | 10702689 | estrogen receptor 1                                                 |
| Esr2                 | NM_012754      | 0.79 | -125  | 10890654 | estrogen receptor 2 (ER beta)                                       |
| Fbxo16               | NM_001013132   | 1.31 | 15    | 10781089 | F-box protein 16                                                    |
| Fbxo33               | NM_001108023   | 1.23 | 19.51 | 10890156 | F-box protein 33                                                    |
| Hes1                 | NM_024360      | 0.83 | -69   | 10754943 | hairy and enhancer of split 1 (Drosophila)                          |
| Ipo4                 | NM_001106038   | 1.27 | 56    | 10783818 | importin 4                                                          |
| Klhdc8a              | NM_001100683   | 1.90 | 173   | 10763883 | kelch domain containing 8A                                          |
| Litaf                | NM_001105735   | 1.35 | 31    | 10731493 | lipopolysaccharide-induced TNF factor                               |
| Mdm4                 | NM_001012026   | 0.64 | -141  | 10767663 | Mdm4 p53 binding protein homolog (mouse)                            |
| Ndrp2                | NM_133583      | 1.51 | 194   | 10783213 | N-myc downstream regulated gene 2                                   |
| Nrip1                | NM_001100560   | 0.79 | -187  | 10752754 | nuclear receptor interacting protein 1                              |
| RGD1306820           | NM_001107557   | 0.71 | -25   | 10711743 | similar to erythroid differentiation-related factor 1               |
| Sarnp                | NM_001033070   | 0.79 | -162  | 10893247 | SAP domain containing ribonucleoprotein                             |
| Scai                 | ENSRNOT0000003 | 0.63 | -69   | 10844916 | suppressor of cancer cell invasion                                  |
| Sirt7                | NM_001107073   | 1.32 | 50    | 10749704 | sirtuin 7 (silent mating type information regulation 2, homolog) 7  |
| Snrpf                | NM_001126091   | 0.77 | -38   | 10901920 | small nuclear ribonucleoprotein polypeptide F                       |
| Srebf2               | NM_001033694   | 1.21 | 82    | 10898091 | sterol regulatory element binding transcription factor 2            |
| Stat1                | NM_032612      | 1.53 | 104   | 10927842 | signal transducer and activator of transcription 1                  |

|                                               |                  |      |      |          |                                                                      |
|-----------------------------------------------|------------------|------|------|----------|----------------------------------------------------------------------|
| Stat5b                                        | NM_022380        | 1.58 | 91   | 10747494 | signal transducer and activator of transcription 5B                  |
| Stat6                                         | NM_001044250     | 1.40 | 27   | 10895932 | signal transducer and activator of transcription 6                   |
| RGD1304792                                    | NM_001134554     | 0.79 | -13  | 10856502 | similar to chromosome 2 open reading frame 3; transcription factor 9 |
| Tcf20                                         | NM_001130574     | 1.21 | 32   | 10905765 | transcription factor 20                                              |
| Zdhhc9                                        | NM_001039016     | 1.21 | 15   | 10939570 | zinc finger, DHHC-type containing 9                                  |
| Zfp207                                        | NM_001039020     | 0.82 | -178 | 10736647 | zinc finger protein 207                                              |
| Zfp40                                         | NM_001168642     | 0.72 | -22  | 10718436 | zinc finger protein 40                                               |
| Znf184                                        | NM_001100573     | 0.82 | -25  | 10798479 | zinc finger protein 184                                              |
| <b>Translation &amp; Protein Modification</b> |                  |      |      |          |                                                                      |
| Cpsf6                                         | NM_001106785     | 0.77 | -70  | 10902552 | cleavage and polyadenylation specific factor 6                       |
| Ddx54                                         | ENSRNOT000000000 | 1.35 | 38   | 10762275 | DEAD (Asp-Glu-Ala-Asp) box polypeptide 54                            |
| Fusip1                                        | NM_001025738     | 0.82 | -64  | 10872929 | FUS interacting protein (serine-arginine rich) 1                     |
| Gars                                          | ENSRNOT000000001 | 1.21 | 189  | 10862666 | glycyl-tRNA synthetase                                               |
| Gemin4                                        | NM_001109037     | 1.21 | 23   | 10745022 | gem (nuclear organelle) associated protein 4                         |
| Hnrnpa1                                       | NM_017248        | 0.83 | -417 | 10932740 | heterogeneous nuclear ribonucleoprotein A1                           |
| Hnrnpa2b1                                     | NM_001104613     | 0.80 | -322 | 10860773 | heterogeneous nuclear ribonucleoprotein A2/B1                        |
| Hnrnpa3                                       | NM_001111295     | 0.81 | -401 | 10823933 | heterogeneous nuclear ribonucleoprotein A3                           |
| Iars                                          | NM_001100572     | 1.41 | 48   | 10797597 | isoleucyl-tRNA synthetase                                            |
| Mrpl36                                        | NM_001108879     | 1.29 | 63   | 10796835 | mitochondrial ribosomal protein L36                                  |
| Mrps18a                                       | NM_198756        | 1.22 | 56   | 10926570 | mitochondrial ribosomal protein S18A                                 |
| Ncl                                           | NM_012749        | 0.80 | -106 | 10779091 | nucleolin                                                            |
| Npm1                                          | NM_012992        | 0.79 | -427 | 10893361 | nucleophosmin (nucleolar phosphoprotein B23, numatrin)               |
| Padi2                                         | NM_017226        | 1.60 | 17   | 10873580 | peptidyl arginine deiminase, type II                                 |
| Paip2l1                                       | ENSRNOT000000002 | 0.75 | -72  | 10710769 | polyadenylate-binding protein-interacting protein 2-like 1           |
| Parp12                                        | NM_001108623     | 1.21 | 24   | 10862014 | poly (ADP-ribose) polymerase family, member 12                       |
| Pthr2                                         | NM_001013860     | 1.30 | 42   | 10737125 | peptidyl-tRNA hydrolase 2                                            |
| Pwp2                                          | NM_001168653     | 1.39 | 49   | 10829244 | PWP2 periodic tryptophan protein homolog (yeast)                     |
| Qk                                            | NM_001115021     | 0.81 | -65  | 10703111 | quaking                                                              |
| Rbm43                                         | NM_001037649     | 0.79 | -21  | 10845130 | RNA binding motif protein 43                                         |
| Rbm47                                         | NM_001005882     | 1.72 | 152  | 10772657 | RNA binding motif protein 47                                         |
| Rpl7a                                         | NM_001114391     | 0.75 | -21  | 10797321 | ribosomal protein L7a                                                |
| Rpsa                                          | NM_017138        | 1.20 | 268  | 10914308 | ribosomal protein SA                                                 |
| Scap                                          | NM_001100966     | 1.44 | 126  | 10913640 | SREBF chaperone                                                      |
| Slfn2                                         | NM_001107031     | 1.95 | 69   | 10736795 | schlafen 2                                                           |
| Syncrip                                       | NM_001047916     | 0.79 | -112 | 10919214 | synaptotagmin binding, cytoplasmic RNA interacting protein           |
| Tbce                                          | NM_001012161     | 0.81 | -59  | 10795528 | tubulin folding cofactor E                                           |
| Tia1                                          | NM_001012096     | 0.68 | -142 | 10856971 | TIA1 cytotoxic granule-associated RNA binding protein                |
| Tra2a                                         | NM_001126296     | 0.76 | -166 | 10862444 | transformer 2 alpha homolog (Drosophila)                             |
| Yars                                          | NM_001025696     | 1.24 | 42   | 10872291 | tyrosyl-tRNA synthetase                                              |
| <b>Miscellaneous &amp; Unknown</b>            |                  |      |      |          |                                                                      |
| Bsdcl1                                        | NM_001106636     | 1.22 | 56   | 10872326 | BSD domain containing 1                                              |
| Fam108a1                                      | NM_001006983     | 1.26 | 38   | 10893768 | family with sequence similarity 108, member A1                       |
| Fam122b                                       | NM_001166586     | 0.60 | -37  | 10939805 | family with sequence similarity 122B                                 |
| Fam126a                                       | ENSRNOT000000001 | 1.39 | 172  | 10852953 | family with sequence similarity 126, member A                        |
| Fam49b                                        | BC166469         | 0.81 | -228 | 10904018 | family with sequence similarity 49, member B                         |
| Fam73b                                        | NM_001106566     | 1.29 | 35   | 10835213 | family with sequence similarity 73, member B                         |
| LOC500420                                     | BC089864         | 1.21 | 28   | 10875751 | similar to CG12279-PA                                                |
| LOC500625                                     | NM_001025151     | 0.69 | -52  | 10883423 | hypothetical protein LOC500625                                       |
| Morn4                                         | NM_001024975     | 1.20 | 23   | 10715455 | MORN repeat containing 4                                             |
| RGD1305689                                    | NM_001008297     | 1.44 | 289  | 10789740 | similar to DNA segment, Chr 14, ERATO Doi 449, expressed             |
| RGD1307882                                    | ENSRNOT000000001 | 0.73 | -12  | 10853900 | similar to CG9346-PA                                                 |
| RGD1308616                                    | XM_001069457     | 0.78 | -12  | 10879217 | similar to KIAA0467 protein                                          |



|              |                 |      |      |          |                                                                     |
|--------------|-----------------|------|------|----------|---------------------------------------------------------------------|
| RGD1309228   | NM_001017451    | 1.38 | 76   | 10889027 | similar to putative protein, with at least 9 transmembrane domains, |
| RGD1310769   | NM_001106749    | 1.30 | 118  | 10891297 | similar to HSPC288                                                  |
| RGD1311422   | ENSRNOT00000000 | 1.40 | 23   | 10748935 | similar to CG8841-PA                                                |
| RGD1559961   | NM_001163736    | 0.83 | -24  | 10745785 | similar to novel protein                                            |
| Romo1        | ENSRNOT00000002 | 1.22 | 39   | 10841484 | reactive oxygen species modulator 1                                 |
| Setd3        | ENSRNOT00000000 | 1.29 | 48   | 10892118 | SET domain containing 3                                             |
| Spryd4       | NM_001037765    | 1.46 | 38   | 10899736 | SPRY domain containing 4                                            |
| Wdr45        | NM_001013958    | 1.22 | 51   | 10937064 | WD repeat domain 45                                                 |
| Wdr46        | NM_212491       | 1.34 | 32   | 10831747 | WD repeat domain 46                                                 |
| Wdr6         | NM_001006988    | 1.26 | 60   | 10920313 | WD repeat domain 6                                                  |
| Wdr90        | XM_213271       | 0.73 | -14  | 10741606 | WD repeat domain 90                                                 |
| <b>EST's</b> |                 |      |      |          |                                                                     |
| RGD1307704   | NM_001108040    | 1.35 | 27   | 10885849 | similar to RIKEN cDNA 2410016006                                    |
| RGD1309906   | NM_001009246    | 1.26 | 47   | 10743723 | similar to RIKEN cDNA 2310004124 gene                               |
| RGD1309926   | ENSRNOT00000000 | 1.55 | 18   | 10732657 | similar to RIKEN cDNA G431001E03 gene                               |
| RGD1560207   | XM_576972       | 0.54 | -18  | 10938176 | similar to chromosome X open reading frame 22                       |
| RGD1560277   | XM_001066043    | 1.46 | 23   | 10708167 | similar to RIKEN cDNA D330012F22 gene                               |
| RGD1563680   | ENSRNOT00000000 | 0.80 | -17  | 10838559 | similar to CDNA sequence BC052040                                   |
|              | ENSRNOT00000005 | 0.66 | -383 | 10788858 |                                                                     |
|              | ---             | 0.74 | -254 | 10862453 |                                                                     |
|              | ---             | 0.64 | -248 | 10700398 |                                                                     |
|              | ENSRNOT00000005 | 0.69 | -213 | 10772758 |                                                                     |
|              | ---             | 0.53 | -207 | 10714204 |                                                                     |
|              | ---             | 0.82 | -193 | 10700124 |                                                                     |
|              | ENSRNOT00000003 | 0.80 | -154 | 10903977 |                                                                     |
|              | ENSRNOT00000004 | 0.77 | -144 | 10797009 |                                                                     |
|              | ENSRNOT00000006 | 0.78 | -129 | 10793597 |                                                                     |
|              | ---             | 0.66 | -113 | 10700714 |                                                                     |
|              | ---             | 0.65 | -110 | 10701207 |                                                                     |
|              | ---             | 0.77 | -110 | 10700841 |                                                                     |
|              | GENSCAN00000002 | 0.78 | -102 | 10919226 |                                                                     |
|              | ENSRNOT00000005 | 0.57 | -75  | 10713600 |                                                                     |
|              | ---             | 0.56 | -72  | 10701246 |                                                                     |
|              | ENSRNOT00000004 | 0.79 | -72  | 10719074 |                                                                     |
|              | ENSRNOT00000004 | 0.79 | -72  | 10746652 |                                                                     |
|              | ---             | 0.74 | -63  | 10701044 |                                                                     |
|              | ENSRNOT00000004 | 0.65 | -63  | 10738162 |                                                                     |
|              | ---             | 0.47 | -56  | 10700268 |                                                                     |
|              | ---             | 0.73 | -55  | 10765036 |                                                                     |
|              | ---             | 0.82 | -53  | 10701109 |                                                                     |
|              | ENSRNOT00000005 | 0.71 | -51  | 10834598 |                                                                     |
|              | ENSRNOT00000005 | 0.70 | -48  | 10802710 |                                                                     |
|              | ENSRNOT00000003 | 0.82 | -47  | 10825062 |                                                                     |
|              | AJ240056        | 0.75 | -47  | 10733045 |                                                                     |
|              | AJ240056        | 0.77 | -46  | 10733047 |                                                                     |
|              | ---             | 0.51 | -44  | 10700624 |                                                                     |
|              | ---             | 0.42 | -43  | 10700213 |                                                                     |
|              | ---             | 0.56 | -42  | 10700311 |                                                                     |
|              | ENSRNOT00000005 | 0.69 | -39  | 10910768 |                                                                     |
|              | ---             | 0.47 | -39  | 10700112 |                                                                     |
|              | ---             | 0.54 | -38  | 10701019 |                                                                     |
|              | ---             | 0.58 | -35  | 10700580 |                                                                     |

|  |                |      |       |          |  |
|--|----------------|------|-------|----------|--|
|  | ---            | 0.78 | -33   | 10926095 |  |
|  | ENSRNOT0000005 | 0.71 | -31   | 10736238 |  |
|  | ---            | 0.74 | -31   | 10700068 |  |
|  | ENSRNOT0000003 | 0.79 | -31   | 10809766 |  |
|  | ENSRNOT0000005 | 0.70 | -31   | 10832840 |  |
|  | ENSRNOT0000005 | 0.70 | -30   | 10802706 |  |
|  | ENSRNOT0000005 | 0.67 | -28   | 10802708 |  |
|  | ENSRNOT0000005 | 0.60 | -26   | 10864356 |  |
|  | AY539927       | 0.53 | -24   | 10868302 |  |
|  | ENSRNOT0000000 | 0.83 | -24   | 10767299 |  |
|  | ENSRNOT0000000 | 0.75 | -23   | 10898947 |  |
|  | rno-mir-16     | 0.58 | -23   | 10815915 |  |
|  | ENSRNOT0000005 | 0.72 | -22   | 10887336 |  |
|  | ENSRNOT0000005 | 0.75 | -22   | 10797019 |  |
|  | ENSRNOT0000006 | 0.76 | -21   | 10805514 |  |
|  | ---            | 0.70 | -19.8 | 10815943 |  |
|  | rno-mir-7a-1   | 0.75 | -19   | 10793838 |  |
|  | ENSRNOT0000005 | 0.75 | -19   | 10713606 |  |
|  | ---            | 0.71 | -18   | 10708587 |  |
|  | ---            | 0.61 | -18   | 10701547 |  |
|  | ---            | 0.54 | -17   | 10700141 |  |
|  | ---            | 0.81 | -17   | 10700303 |  |
|  | ---            | 0.73 | -14   | 10701560 |  |
|  | GENSCAN0000001 | 0.77 | -14   | 10901103 |  |
|  | ---            | 0.60 | -13   | 10700855 |  |
|  | ENSRNOT0000004 | 0.80 | -13   | 10809266 |  |
|  | ENSRNOT0000005 | 0.64 | -12   | 10878963 |  |
|  | ---            | 0.80 | -12   | 10700840 |  |
|  | ---            | 0.54 | -12   | 10700934 |  |
|  | ---            | 0.81 | -12   | 10908131 |  |
|  | ENSRNOT0000005 | 0.73 | -12   | 10756268 |  |
|  | ENSRNOT0000005 | 0.73 | -12   | 10756270 |  |
|  | ENSRNOT0000005 | 0.73 | -12   | 10756272 |  |
|  | ENSRNOT0000005 | 0.73 | -12   | 10759445 |  |
|  | ---            | 0.72 | -11   | 10700214 |  |
|  | ---            | 0.56 | -10   | 10700520 |  |
|  | ENSRNOT0000003 | 0.75 | -10   | 10818946 |  |
|  | ENSRNOT0000005 | 0.70 | -10   | 10888682 |  |
|  | ---            | 1.56 | 10    | 10700584 |  |
|  | ENSRNOT0000006 | 1.27 | 11    | 10863606 |  |
|  | ENSRNOT0000000 | 1.36 | 11    | 10904864 |  |
|  | BC089062       | 1.41 | 12    | 10877753 |  |
|  | ---            | 1.33 | 12    | 10752863 |  |
|  | ENSRNOT0000006 | 1.29 | 12    | 10750810 |  |
|  | ENSRNOT0000005 | 1.32 | 12    | 10793367 |  |
|  | ENSRNOT0000005 | 1.32 | 16    | 10798255 |  |
|  | ENSRNOT0000005 | 1.37 | 17    | 10722449 |  |
|  | ---            | 1.36 | 18    | 10726672 |  |
|  | ---            | 1.43 | 19    | 10700788 |  |
|  | ---            | 1.52 | 21    | 10700608 |  |
|  | ENSRNOT0000006 | 1.39 | 22    | 10913991 |  |
|  | ---            | 1.22 | 23    | 10700247 |  |

|  |                |      |      |          |  |
|--|----------------|------|------|----------|--|
|  | ENSRNOT0000005 | 1.25 | 23   | 10820280 |  |
|  | ---            | 1.46 | 25   | 10700882 |  |
|  | ENSRNOT0000004 | 1.34 | 27   | 10766057 |  |
|  | ---            | 1.48 | 28   | 10701440 |  |
|  | ---            | 1.52 | 35   | 10866408 |  |
|  | ENSRNOT0000004 | 1.25 | 36   | 10854091 |  |
|  | ENSRNOT0000002 | 1.23 | 42   | 10798900 |  |
|  | ENSRNOT0000002 | 1.23 | 44   | 10880530 |  |
|  | ---            | 1.40 | 44   | 10700996 |  |
|  | ---            | 1.49 | 45   | 10701505 |  |
|  | ---            | 1.49 | 54   | 10700409 |  |
|  | ENSRNOT0000005 | 1.28 | 55   | 10770543 |  |
|  | ---            | 1.66 | 56   | 10700706 |  |
|  | ---            | 1.62 | 65   | 10701568 |  |
|  | ---            | 1.25 | 68   | 10700922 |  |
|  | ENSRNOT0000001 | 1.27 | 80   | 10865483 |  |
|  | ---            | 2.03 | 93   | 10700752 |  |
|  | ---            | 1.58 | 100  | 10700861 |  |
|  | ---            | 1.55 | 104  | 10700365 |  |
|  | ---            | 1.22 | 108  | 10701172 |  |
|  | ---            | 1.20 | 114  | 10701058 |  |
|  | ENSRNOT0000000 | 1.52 | 119  | 10751469 |  |
|  | ---            | 1.30 | 130  | 10700223 |  |
|  | ---            | 1.41 | 157  | 10700881 |  |
|  | ---            | 1.22 | 168  | 10701153 |  |
|  | ---            | 1.36 | 231  | 10701066 |  |
|  | J05014         | 1.31 | 1008 | 10876313 |  |
