# Supplementary material for: Environmentally Induced Epigenetic Transgenerational Inheritance of Ovarian Disease
Source: PubMed Central journal article supplement (PMC3343040; doi:10.1371/journal.pone.0036129), 2012-05-03
Supplement: pone.0036129.s004.pdf [file pone.0036129.s004.pdf]

Supplemental Table S2

## DIFFERENTIAL EXPRESSED GENE CLUSTERS

|    | CLUSTER LOCATION          | DMR INSIDE OR WITHIN 2MB OF A CLUSTER | GENES WITH EXPRESSION CHANGE IN THE CLUSTER                                                     |
|----|---------------------------|---------------------------------------|-------------------------------------------------------------------------------------------------|
| 1  | chr1:78900000-81000000    | Ceacam9<br>(within 2MB of cluster)    | Pvrl2, Lipe, Bckdha, Exosc5                                                                     |
| 2  | chr1:80250000-82650000    |                                       | Lipe, Bckdha, Exosc5, Cyp2t1                                                                    |
| 3  | chr1:85550000-87750000    |                                       | Tmem147, Dmkn, Fxyd5, Pepd                                                                      |
| 4  | chr1:94200000-97250000    |                                       | Atf5, Fcgrt, Bcat2, Dbp                                                                         |
| 5  | chr1:161300000-164150000  |                                       | Hbb, RGD1563970, Prkcdbp, Smpd1, Hpx                                                            |
| 6  | chr1:204850000-208800000  |                                       | Cpt1a, Aldh3b1, Unc93b1, Pold4, Ctsf, Frmd8, Tm7sf2                                             |
| 7  | chr1:210700000-213350000  |                                       | EST (chr1:211391510-211391584), EST (chr1:211392892-211392958), Fads1, Fads2, Fads3             |
| 8  | chr1:246800000-250050000  |                                       | Got1, Pyroxd2, Avpi1, Morn4, Scd                                                                |
| 9  | chr3:2800000-6450000      | Lcn11<br>(inside cluster)             | Npdc1, Qsox2, Dnlz, Egfl7, Agpat2, Rpl17a                                                       |
| 10 | chr5:58000000-61150000    |                                       | EST (chr5:58166155-58168558), Sigmar1, Unc13b, NSCAN chr5.329.a (possibly RMRP), Tpm2           |
| 11 | chr5:136900000-138950000  |                                       | Hmgb1 (chr5:136955255-136955995), Ccdc163, RGD1308616, Rps8                                     |
| 12 | chr5:151350000-154850000  |                                       | Xkr8, Sh3bgrl3, Pafah2, NSCAN chr5.1149.a (possibly Sepn1), Fusip1                              |
| 13 | chr5:170750000-174300000  |                                       | Nadk, Ssu72, Aurkaip1, Gltpd1                                                                   |
| 14 | chr7:112700000-116000000  |                                       | Scrib, NSCAN chr7.893.a (possibly Parp10), Bop1, Vps28                                          |
| 15 | chr10:13700000-16100000   |                                       | Nubp2, Wdr90, Tmem8, Rhbdf1                                                                     |
| 16 | chr10:32250000-36050000   |                                       | Gnb2l1 (region 1), Gnb2l1 (region 2), Irgm, Ifi47                                               |
| 17 | chr10:39100000-42350000   | Vdac1<br>(within 2MB of cluster)      | Anxa6, Gm2a, Slc36a1, Hmgb1 (chr10:41063919-41064554)                                           |
| 18 | chr10:62500000-65550000   |                                       | Gemin4, LOC360570, Pigs, Rpl23a                                                                 |
| 19 | chr10:86850000-90800000   | Plekhm1<br>(within 2MB of cluster)    | Crkrs, Tns4, Krtap4-5, NSCAN chr10.1275.a, Rab5c, Stat5b, Vat1                                  |
| 20 | chr10:103400000-107350000 |                                       | Ttyh2, Slc9a3r1, Fdxr, Fads6, RGD1311422, Hmgb1 (chr10:105805282-105805930), Fbf1, Acox1, Sphk1 |
| 21 | chr13:85400000-88800000   |                                       | Fcgr2a (region 1), Fcgr2a (region 2), Nit1, F11r                                                |
| 22 | chr15:31800000-34250000   |                                       | Abhd4, Lrp10, Jub, Ipo4                                                                         |
| 23 | chr17:6700000-8700000     |                                       | RGD1561537, NSCAN chr17.055.a (region 1), NSCAN chr17.055.a (region 2), NSCAN chr17.056.a       |
| 24 | chr20:2850000-6800000     | Agpat1<br>(inside cluster)            | Stk19, Psmb8, Tap1, RT1-DMb, RT1-Dma, RT1-A1, Wdr46                                             |
| 25 | chr20:11650000-15150000   | LOC686922<br>(inside cluster)         | Col6a1, Gstt2, Ddt, Gstt1, Gstt3                                                                |
