# Supplementary material for: Environmentally Induced Epigenetic Transgenerational Inheritance of Ovarian Disease
Source: PubMed Central journal article supplement (PMC3343040; doi:10.1371/journal.pone.0036129), 2012-05-03
Supplement: pone.0036129.s005.pdf [file pone.0036129.s005.pdf]

**Supplemental Table S3. Doses and Sources of Chemicals Used**

| <b>Treatment ID</b> | <b>Chemical</b>    | <b>Dose</b>    | <b>Source</b>                       | <b>% Oral LD50 Dose</b> |
|---------------------|--------------------|----------------|-------------------------------------|-------------------------|
| <b>Control</b>      | Control (DSMO 50%) | 100 µl/kg BW/d | Sigma Aldrich Corp, St. Louis, MO   |                         |
| <b>Vinclozolin</b>  | Vinclozolin        | 100 mg/kg BW/d | Chem Service, West Chester, PA      | 1%                      |
| <b>Pesticides</b>   | Permethrin         | 150 mg/kg BW/d | Sigma Aldrich Corp, St. Louis, MO   | 39%                     |
|                     | DEET               | 40 mg/kg BW/d  | Chem Service, West Chester, PA      | 2%                      |
| <b>Dioxin</b>       | TCCD               | 100 ng/kg BW/d | Cambridge Isotope Labs, Andover, MA | 0.1%                    |
| <b>Plastics</b>     | Bisphenol A        | 50 mg/kg BW/d  | Sigma Aldrich Corp, St. Louis, MO   | 1%                      |
|                     | DEHP               | 750 mg/kg BW/d | Sigma Aldrich Corp, St. Louis, MO   | 0.025%                  |
|                     | DBP                | 66 mg/kg BW/d  | Sigma Aldrich Corp, St. Louis, MO   | 0.8%                    |
| <b>Jet Fuel</b>     | JP8                | 500 mg/kg BW/d | Lt Dean Wagner, Dayton, OH          | 25%                     |

The **low dose plastics** used 50% the dose listed above for BPA, DEHP and DBP
